# Supplementary material for: Refractometric and colorimetric index sensing by a plasmon-coupled hybrid AAO nanotemplate
Source: Royal Society of Chemistry journal article supplement (doi:10.1039/c5ra17637a), 2015-01-01
Supplement: c5ra17637a1.pdf [file c5ra17637a1.pdf]

## Supplementary Information

# Refractometric and colorimetric index sensing by plasmon-coupled hybrid AAO nanotemplate

Kyuyoung Bae,<sup>a</sup> Jungmin Lee,<sup>a</sup> Gumin Kang,<sup>a</sup> Do-sik Yoo,<sup>b</sup> Chang-Won Lee\*<sup>c</sup> and Kyoungsik Kim\*<sup>a</sup>

<sup>a</sup> School of Mechanical Engineering, Yonsei University, 50 Yonsei-ro, Seodaemun-gu, Seoul 120-749, Korea. E-mail: kks@yonsei.ac.kr

<sup>b</sup> School of Electronic and Electrical Engineering, Hongik University, 94 Wausan-Ro, Mapo-Gu, Seoul 121-791, Republic of Korea.

<sup>c</sup> Samsung Advanced Institute of Technology, Suwon, Korea. E-mail: cwlee42@gmail.com

\* Corresponding authors

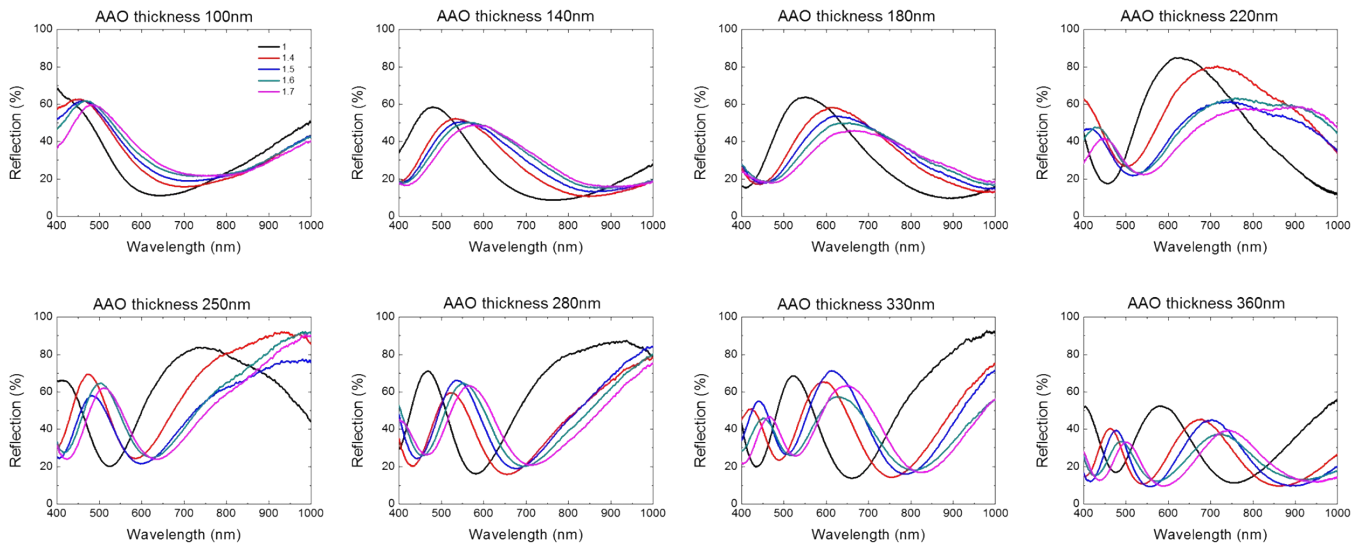

Fig. S1 Measured reflectance spectra of the plasmonic AAO nanostructure of Fig. 4. All reflection spectrum was measured by a fiber-coupled grating spectrometer (Ocean optics USB2000+). The light source was Tungsten Halogen. We used a reference silver mirror (Thorlabs PF10-03-P01) as a calibration reflection measurement. The reflection peaks and dips are linearly shifted by changing surrounding medium. The intensities of the spectra was influenced by amount of liquids, but the location of peaks and dips were not changed.
